# Supplementary material for: Structural Characterization, Antioxidant and Antitumor Activities of the Two Novel Exopolysaccharides Produced by Debaryomyces hansenii DH-1
Source: MDPI journal article supplement (doi:10.3390/ijms24010335), 2022-12-25
Supplement: s1 [file s1]

## Supplementary Materials:

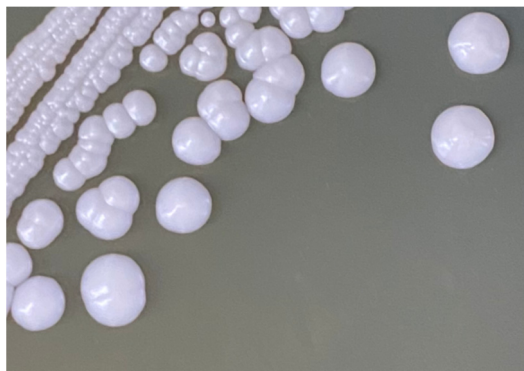

**Figure S1.** Growth morphology of *D. Hansenii* DH-1 on agar plate.

**A**

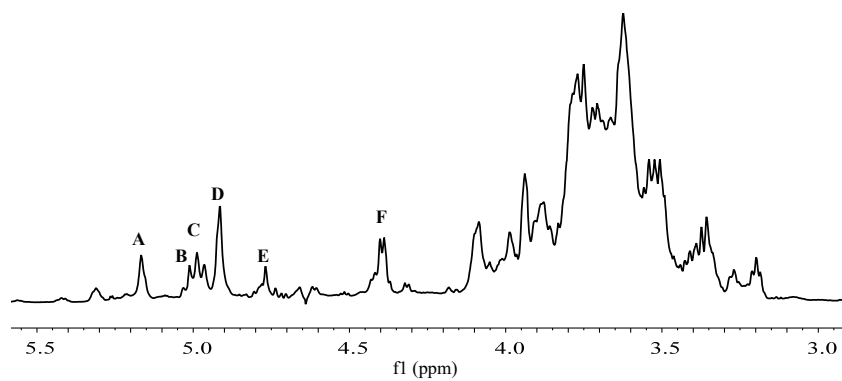

**B**

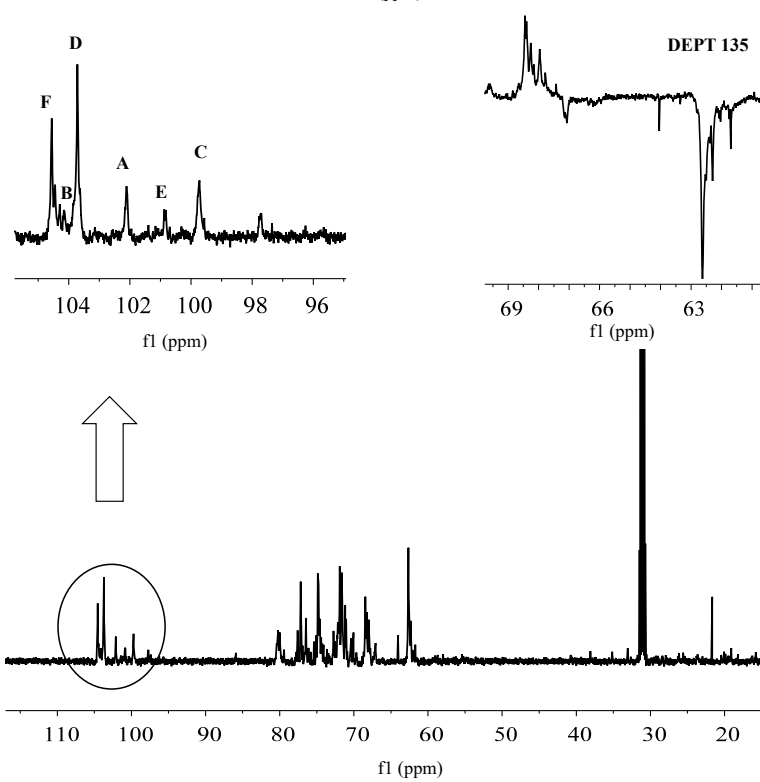

**Figure S2.** NMR spectrum analysis of S1. (A)  $^1\text{H}$  spectrum, (B)  $^{13}\text{C}$  spectrum.

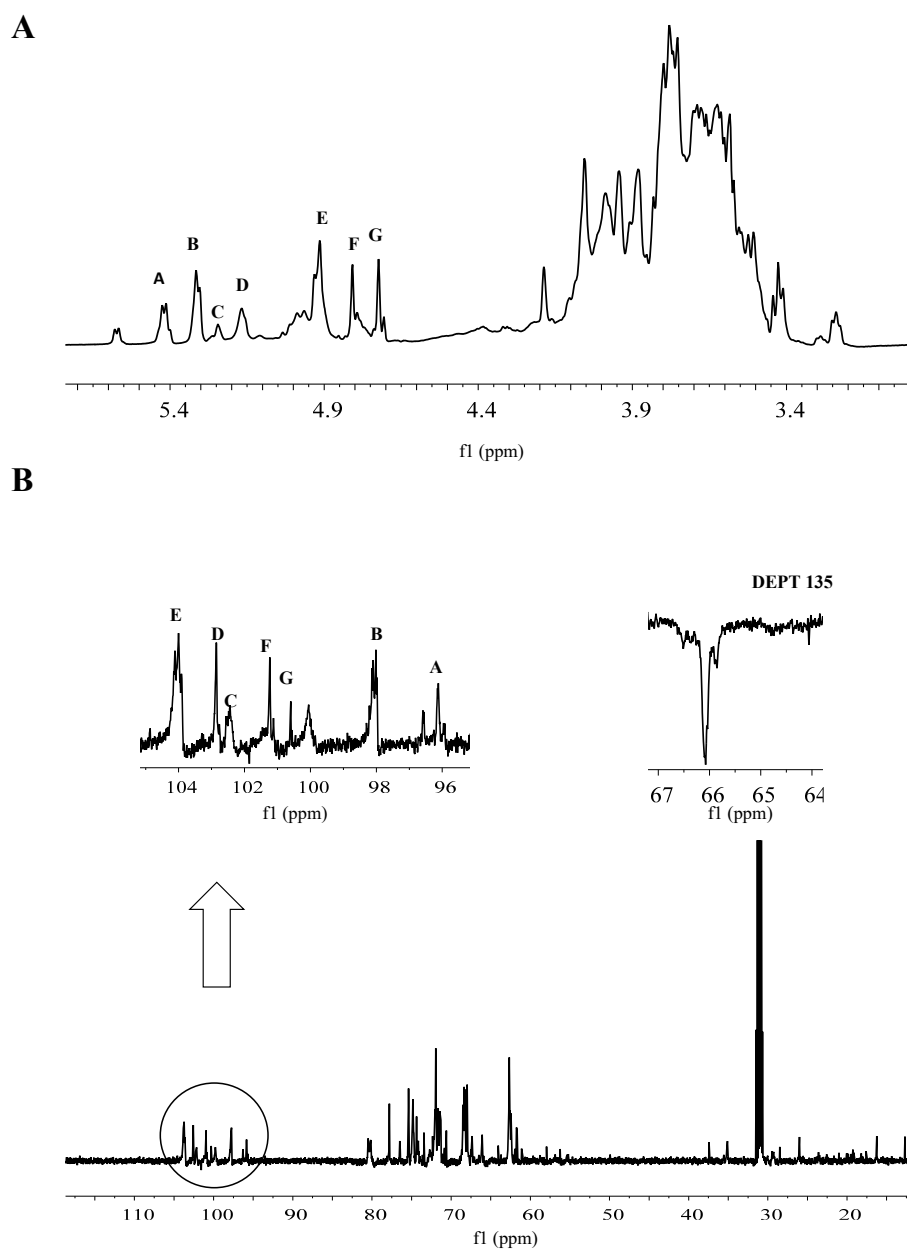

**Figure S3.** NMR spectrum analysis of S2. (A)  $^1\text{H}$  spectrum, (B)  $^{13}\text{C}$  spectrum.

**Table S1.** Molecular Weight Averages of EPSs.

| Polysaccharides | Mp (g/mol) | Mn (g/mol) | Mw (g/mol) | Mz (g/mol) | Mz+1 (g/mol) |
|-----------------|------------|------------|------------|------------|--------------|
| S1              | 13869      | 13655      | 34594      | 138813     | 321152       |
| S2              | 8833       | 12988      | 24657      | 91134      | 255994       |
